# Supplementary material
Source: PubMed Central journal article supplement (PMC7194202)
Supplement: NIHMS1580467-supplement-Supplementary_Data.pdf [file NIHMS1580467-supplement-Supplementary_Data.pdf]

In the format provided by the authors and unedited.

# Sequential phosphoproteomics and N-glycoproteomics of plasma-derived extracellular vesicles

Hillary Andaluz Aguilar<sup>1</sup>, Anton B. Iliuk<sup>2,3</sup>, I-Hsuan Chen<sup>3</sup> and W. Andy Tao<sup>1,2,3,4\*</sup>

---

<sup>1</sup>Department of Chemistry, Purdue University, West Lafayette, IN, USA. <sup>2</sup>Tymora Analytical Operations, West Lafayette, IN, USA. <sup>3</sup>Department of Biochemistry, Purdue University, West Lafayette, IN, USA. <sup>4</sup>Purdue Center for Cancer Research, Purdue University, West Lafayette, IN, USA. \*e-mail: [watao@purdue.edu](mailto:watao@purdue.edu)

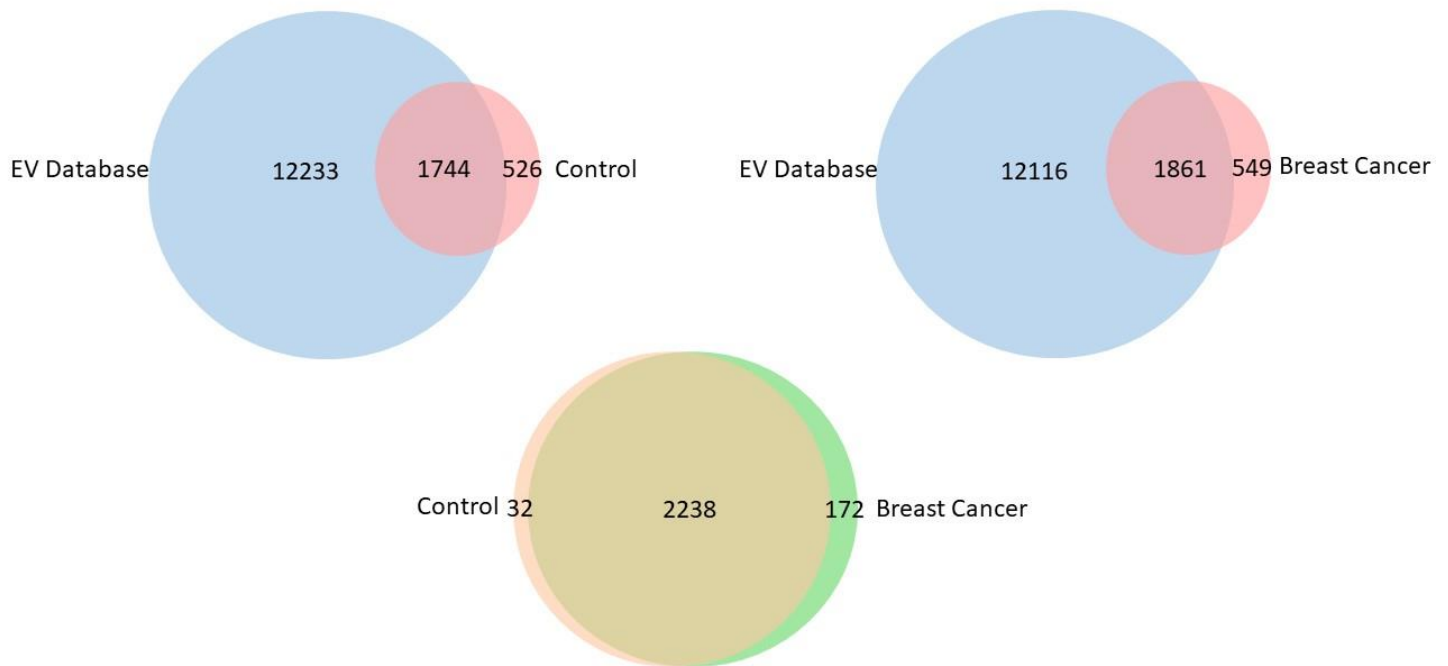

### Supplementary Figure 1

Venn diagrams showing the overlap between the EV database from Vesiclepedia and EV data from control and breast cancer.

The Venn diagrams show a 77% overlap between both, the EV database and control EV proteins, and the EV database and EV breast cancer proteins. Overlap of the proteome from the control and the breast cancer EV data is also shown.

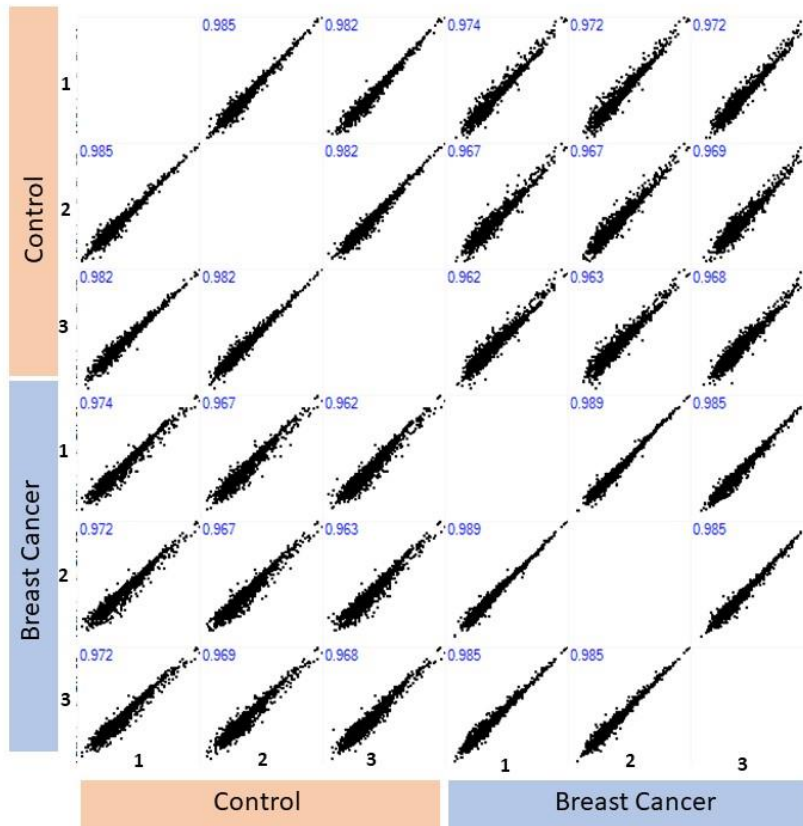

**Supplementary Figure 2**

Quantitation results from MaxQuant and Perseus showing Pearson correlations from proteome analysis across each condition and replicate.

Scatterplots and Pearson correlation coefficients depicting the log<sub>2</sub>-transformed intensities from proteome analysis of control and breast cancer samples, each in triplicate.

### Variation Between Same Cohort

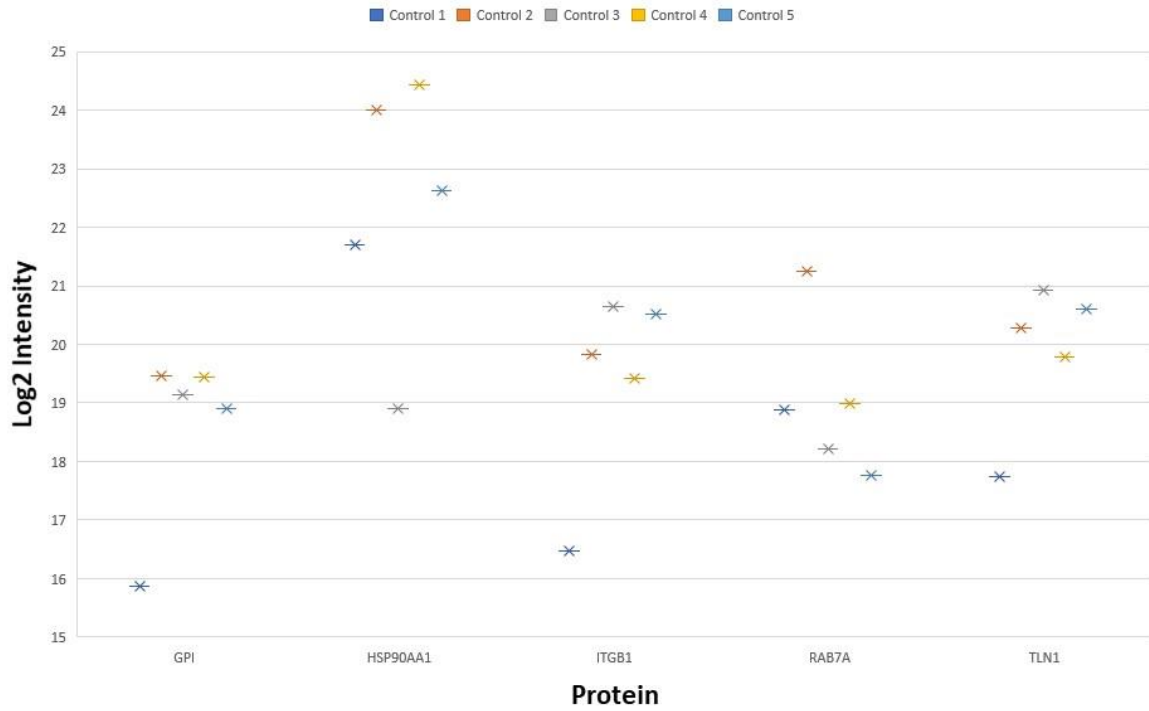

### Supplementary Figure 3

Scatterplots representing the targeted proteomic (PRM) analysis.

Raw intensities from five individual control samples corresponding to five phosphopeptides from five EV proteins were plotted. See Table S1 for details.

**Supplementary Table 1**

Comparison of EV phosphopeptides, phosphoproteins, N-glycopeptides and N-glycoproteins using sequential or separate procedures.

| <b>Sample</b> | <b>#phosphopeptides</b> | <b>#total peptides</b> | <b>Selectivity</b> | <b>#phosphoproteins</b> |
|---------------|-------------------------|------------------------|--------------------|-------------------------|
| Sequential 1  | 3947                    | 6110                   | 65%                | 1298                    |
| Sequential 2  | 3864                    | 5963                   | 65%                | 1289                    |
| Sequential 3  | 3845                    | 5948                   | 65%                | 1276                    |
| Separate 1    | 4156                    | 6022                   | 69%                | 1361                    |
| Separate 2    | 4176                    | 5997                   | 70%                | 1371                    |
| Separate 3    | 4186                    | 5973                   | 70%                | 1372                    |

| <b>Sample</b> | <b>#glycopeptides</b> | <b>#total peptides</b> | <b>Selectivity</b> | <b>#glycoproteins</b> |
|---------------|-----------------------|------------------------|--------------------|-----------------------|
| Sequential 1  | 1003                  | 2389                   | 42%                | 653                   |
| Sequential 2  | 1005                  | 2439                   | 41%                | 638                   |
| Sequential 3  | 1004                  | 2407                   | 42%                | 638                   |
| Separate 1    | 1042                  | 1960                   | 53%                | 673                   |
| Separate 2    | 1013                  | 1893                   | 54%                | 656                   |
| Separate 3    | 1043                  | 1943                   | 54%                | 660                   |

**Supplementary Table 2**

Raw intensities from five individual control samples monitoring five peptides corresponding to five EV proteins, including mean, SD and CV (%).

Proteins selected are in the top 100 EV proteins from Vesiclepedia.

| Protein Gene | Peptide      | Peptide Modified Sequence<br>Average Masses | Precursor<br>Charge | Control 1 | Control 2 | Control 3 | Control 4 | Control 5 | Mean     | SD       | CV (%)   |
|--------------|--------------|---------------------------------------------|---------------------|-----------|-----------|-----------|-----------|-----------|----------|----------|----------|
| GPI          | SNTPILVDGK   | SNT[+79.979901]PILVDGK                      | 2                   | 59865     | 718569    | 575007    | 712412    | 487559    | 510682.4 | 241586.6 | 47.30662 |
| HSP90AA1     | EVSDDEAEK    | EVS[+79.979901]DDEAEK                       | 2                   | 3382085   | 16903736  | 488350    | 22667768  | 6458404   | 9980069  | 8425475  | 84.42301 |
| ITGB1        | WDTGENPIYK   | WDT[+79.979901]GENPIYK                      | 2                   | 90336     | 930164    | 1637321   | 698009    | 1506258   | 972417.6 | 562536.3 | 57.84925 |
| RAB7A        | FQSLGVAFYR   | FQS[+79.979901]LGVAFYR                      | 2                   | 486314    | 2491084   | 302097    | 521000    | 221576    | 804414.2 | 850692.6 | 105.7531 |
| TLN1         | VLVQNAAGSQEK | VLVQNAAGS[+79.979901]QEK                    | 2                   | 219752    | 1279873   | 1986830   | 902402    | 1582806   | 1194333  | 603541.5 | 50.53379 |
